# Supplementary material for: Connectivity-guided intermittent theta burst versus repetitive transcranial magnetic stimulation for treatment-resistant depression: a randomized controlled trial
Source: Springer Nature journal article supplement (doi:10.1038/s41591-023-02764-z), 2024-01-16
Supplement: MOESM1 [file 41591_2023_2764_MOESM1_ESM.pdf]

# Connectivity-guided intermittent theta burst versus repetitive transcranial magnetic stimulation for treatment-resistant depression: a randomized controlled trial

---

In the format provided by the  
authors and unedited

**Supplementary Table 1. Moderators of primary outcome with TMS**

|                                           | Number of participants |        | cgiTBS vs rTMS<br>over 26 weeks      | P-value      |
|-------------------------------------------|------------------------|--------|--------------------------------------|--------------|
|                                           | rTMS                   | cgiTBS | Adjusted mean difference<br>(95% CI) |              |
| Moderator analyses                        |                        |        |                                      |              |
| Baseline GRID-HDRS-17 score               | 118                    | 115    | 0.69 (0.45, 0.93)                    | <b>0.000</b> |
| Baseline GRID-HDRS-17 score*treatment arm |                        |        | -0.09 (-0.43, 0.24)                  | 0.593        |
| Baseline MGHS score                       | 118                    | 115    | 0.30 (-0.01, 0.61)                   | 0.058        |
| Baseline MGHS score*treatment arm         |                        |        | 0.05 (-0.38, 0.48)                   | 0.830        |
| Age at Baseline                           | 118                    | 115    | -0.04 (-0.12, 0.05)                  | 0.391        |
| Age at Baseline*treatment arm             |                        |        | -0.02 (-0.13, 0.09)                  | 0.723        |
| Number of TMS sessions <sup>a</sup>       | 118                    | 115    | -5.64 (-9.48, -1.80)                 | <b>0.004</b> |
| Number of TMS sessions*treatment arm      |                        |        | 3.48 (-2.20, 9.17)                   | 0.230        |
| Baseline CTQ score                        | 111                    | 108    | 0.004 (-0.06, 0.07)                  | 0.915        |
| Baseline CTQ score*treatment arm          |                        |        | 0.01 (-0.08, 0.11)                   | 0.788        |
| Baseline GAD-7 score                      | 118                    | 115    | 0.36 (0.11, 0.61)                    | <b>0.004</b> |
| Baseline GAD-7 score*treatment arm        |                        |        | -0.10 (-0.42, 0.23)                  | 0.569        |
| Gender                                    | 118                    | 115    | 0.61 (-1.57, 2.80)                   | 0.581        |
| Gender*treatment arm                      |                        |        | -2.19 (-5.32, 0.94)                  | 0.171        |

**Footnote:**

<sup>a</sup> This includes number of rTMS or cgiTBS treatment sessions that were delivered as per MRI data or as per changes allowed in the TMS SOP. This moderator was included in the model as a dichotomous variable.

<sup>b</sup> Women vs Men, Men as reference.

Bold indicates statistically significant moderators of outcome.

All analyses were two-sided with no adjustment for multiple comparisons. Moderators regarded as continuous variables with an interaction term between the potential moderator and treatment arm included in the intention to treat analysis using a mixed linear regression model.
